# Supplementary material for: Nitrogen/phosphorus co-doped porous carbon materials for supercapacitor electrodes
Source: Royal Society of Chemistry journal article supplement (doi:10.1039/d1nj01091c), 2021-01-01
Supplement: d1nj01091c1.pdf [file d1nj01091c1.pdf]

## Electronic Supplementary Information

### Nitrogen/phosphorus co-doped porous carbon materials for supercapacitor electrodes

Ting Zeng, Hongyan Miao, Likui Wang,\* Yun Liu, Gang Shi, Bolong Yao

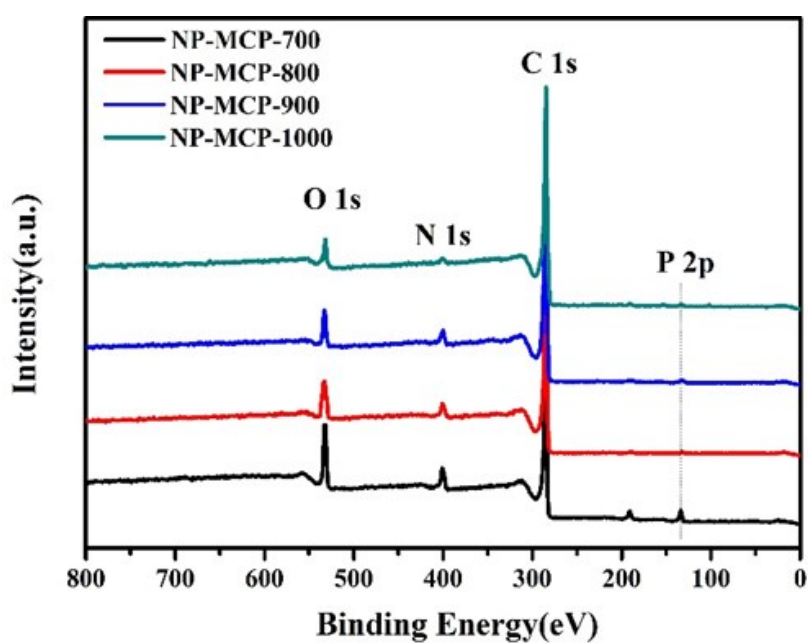

Fig. S1 XPS patterns of N-CTF-T samples.

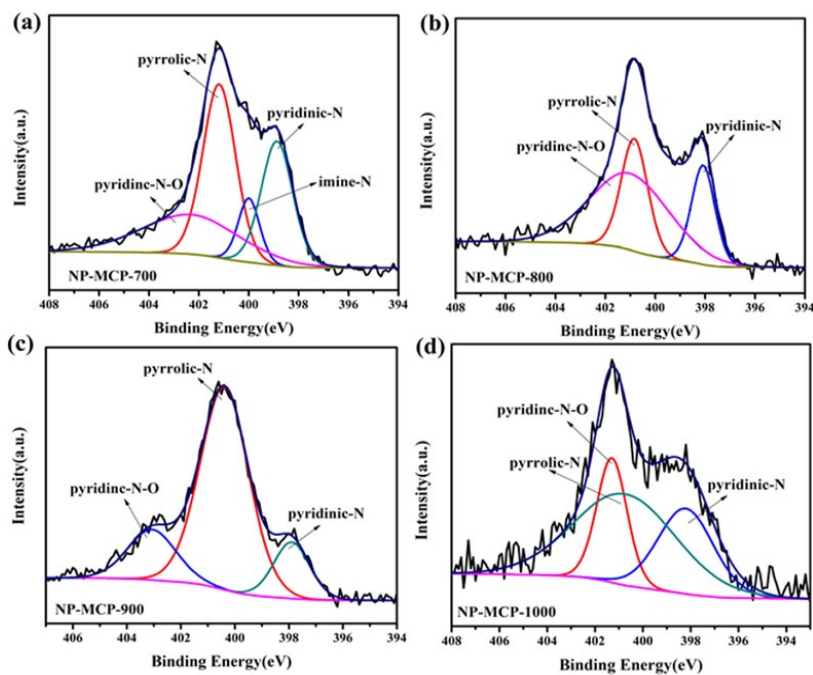

Fig. S2 N 1s spectra of NP-MCP-T samples.

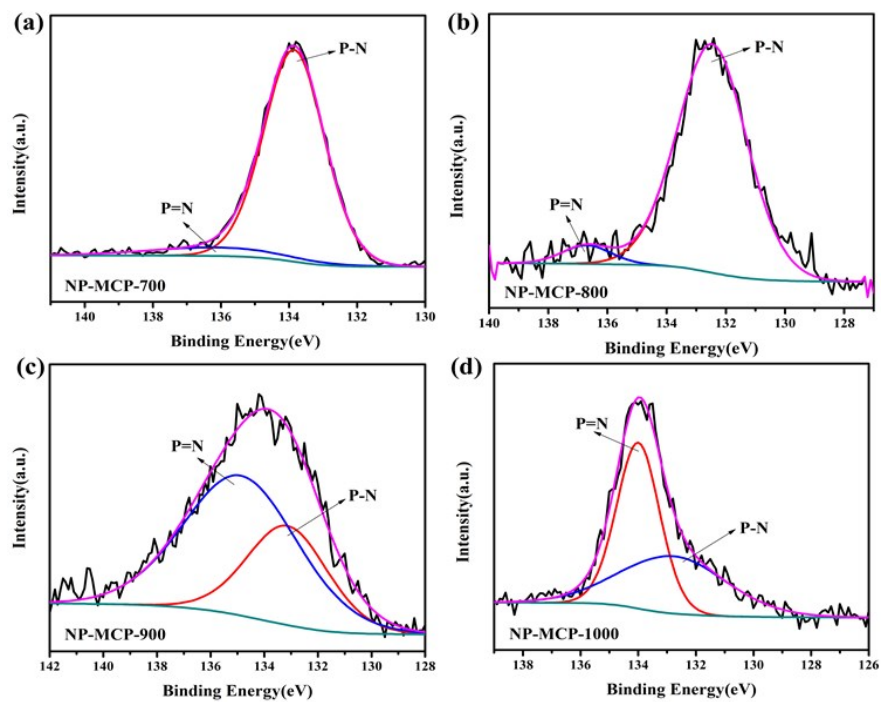

Fig. S3 P 2p spectra of NP-MCP-T samples.

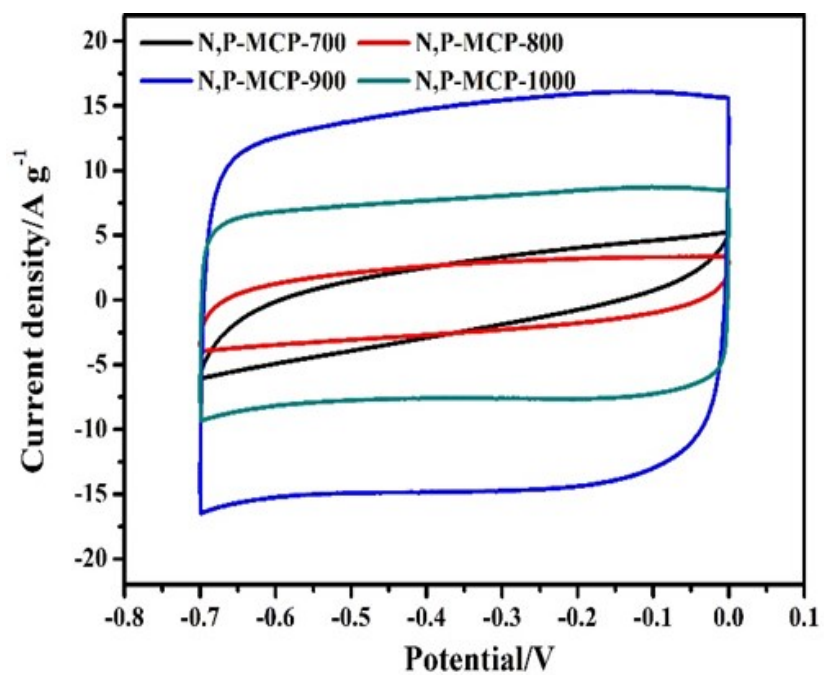

Fig. S4 CV curves of NP-MCP-T samples at a scan rate of 100 mV s<sup>-1</sup>.

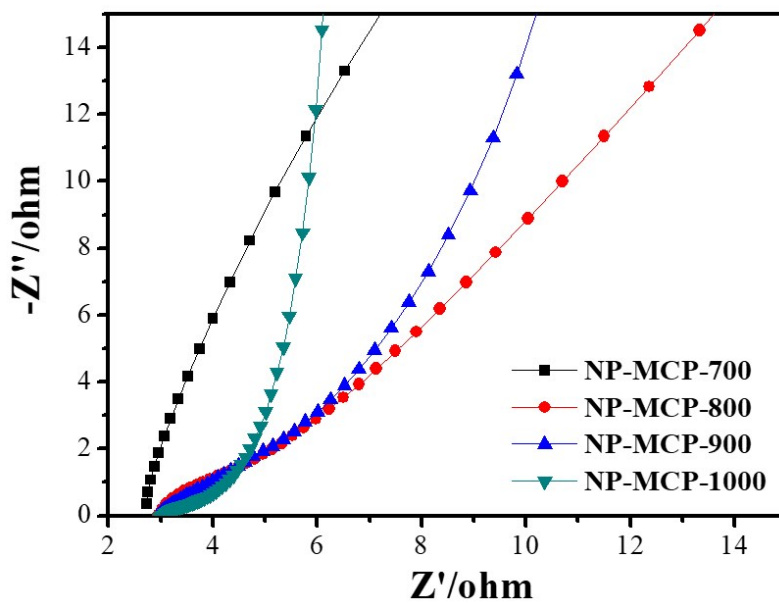

Fig. S5 The close-up of the EIS spectra of the samples

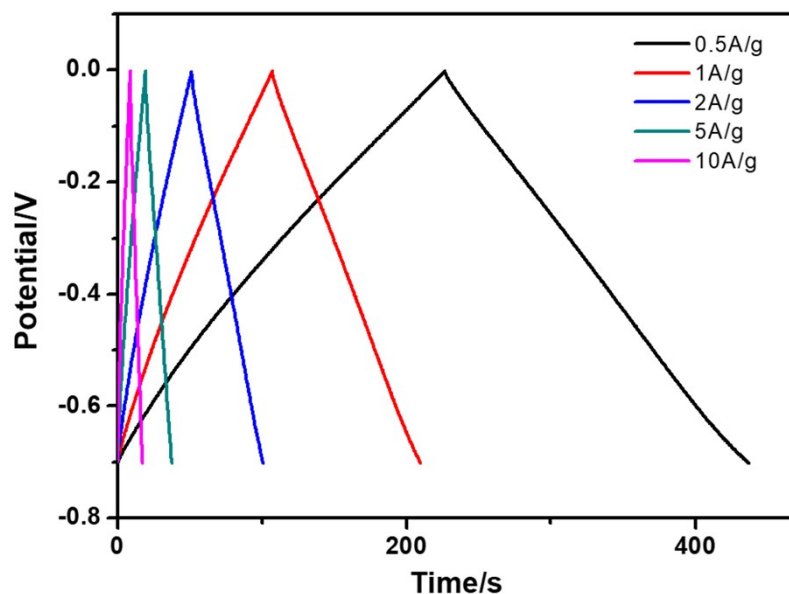

**Fig. S6** Galvanostatic charge and discharge (GCD) curves of YP-50F (Kuraray, Japan) measured at the same condition. Its specific capacitance is calculated to be  $150.0 \text{ F g}^{-1}$ ,  $145.2 \text{ F g}^{-1}$ ,  $142.4 \text{ F g}^{-1}$ ,  $131.4 \text{ F g}^{-1}$  and  $119.8 \text{ F g}^{-1}$  at  $0.5 \text{ A g}^{-1}$ ,  $1 \text{ A g}^{-1}$ ,  $2 \text{ A g}^{-1}$ ,  $5 \text{ A g}^{-1}$ ,  $10 \text{ A g}^{-1}$ , respectively.

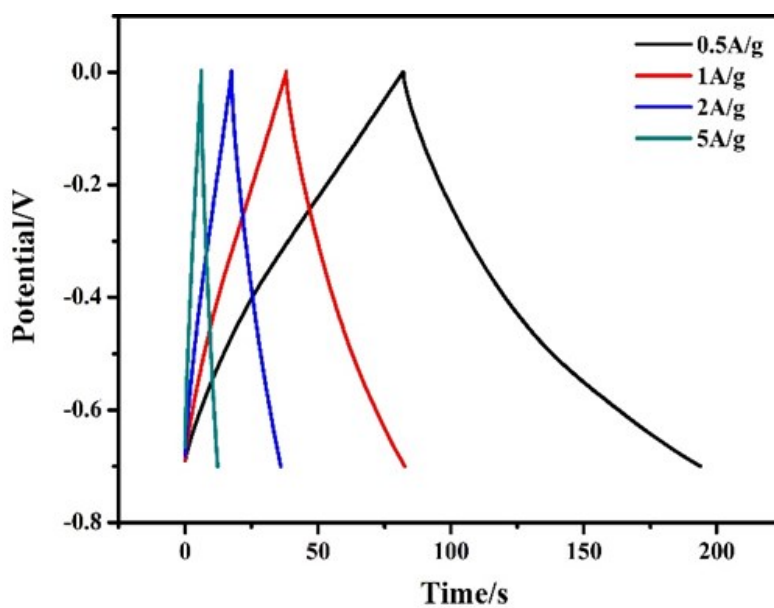

**Fig. S7** GCD curves of NP-MCP-900 tested in the two-electrode configuration.
